# Supplementary material
Source: Springer Nature journal article supplement (https://www.springermedizin.de/resource/supplementary/13012_2012_620_MOESM2_ESM.pdf/9630390)

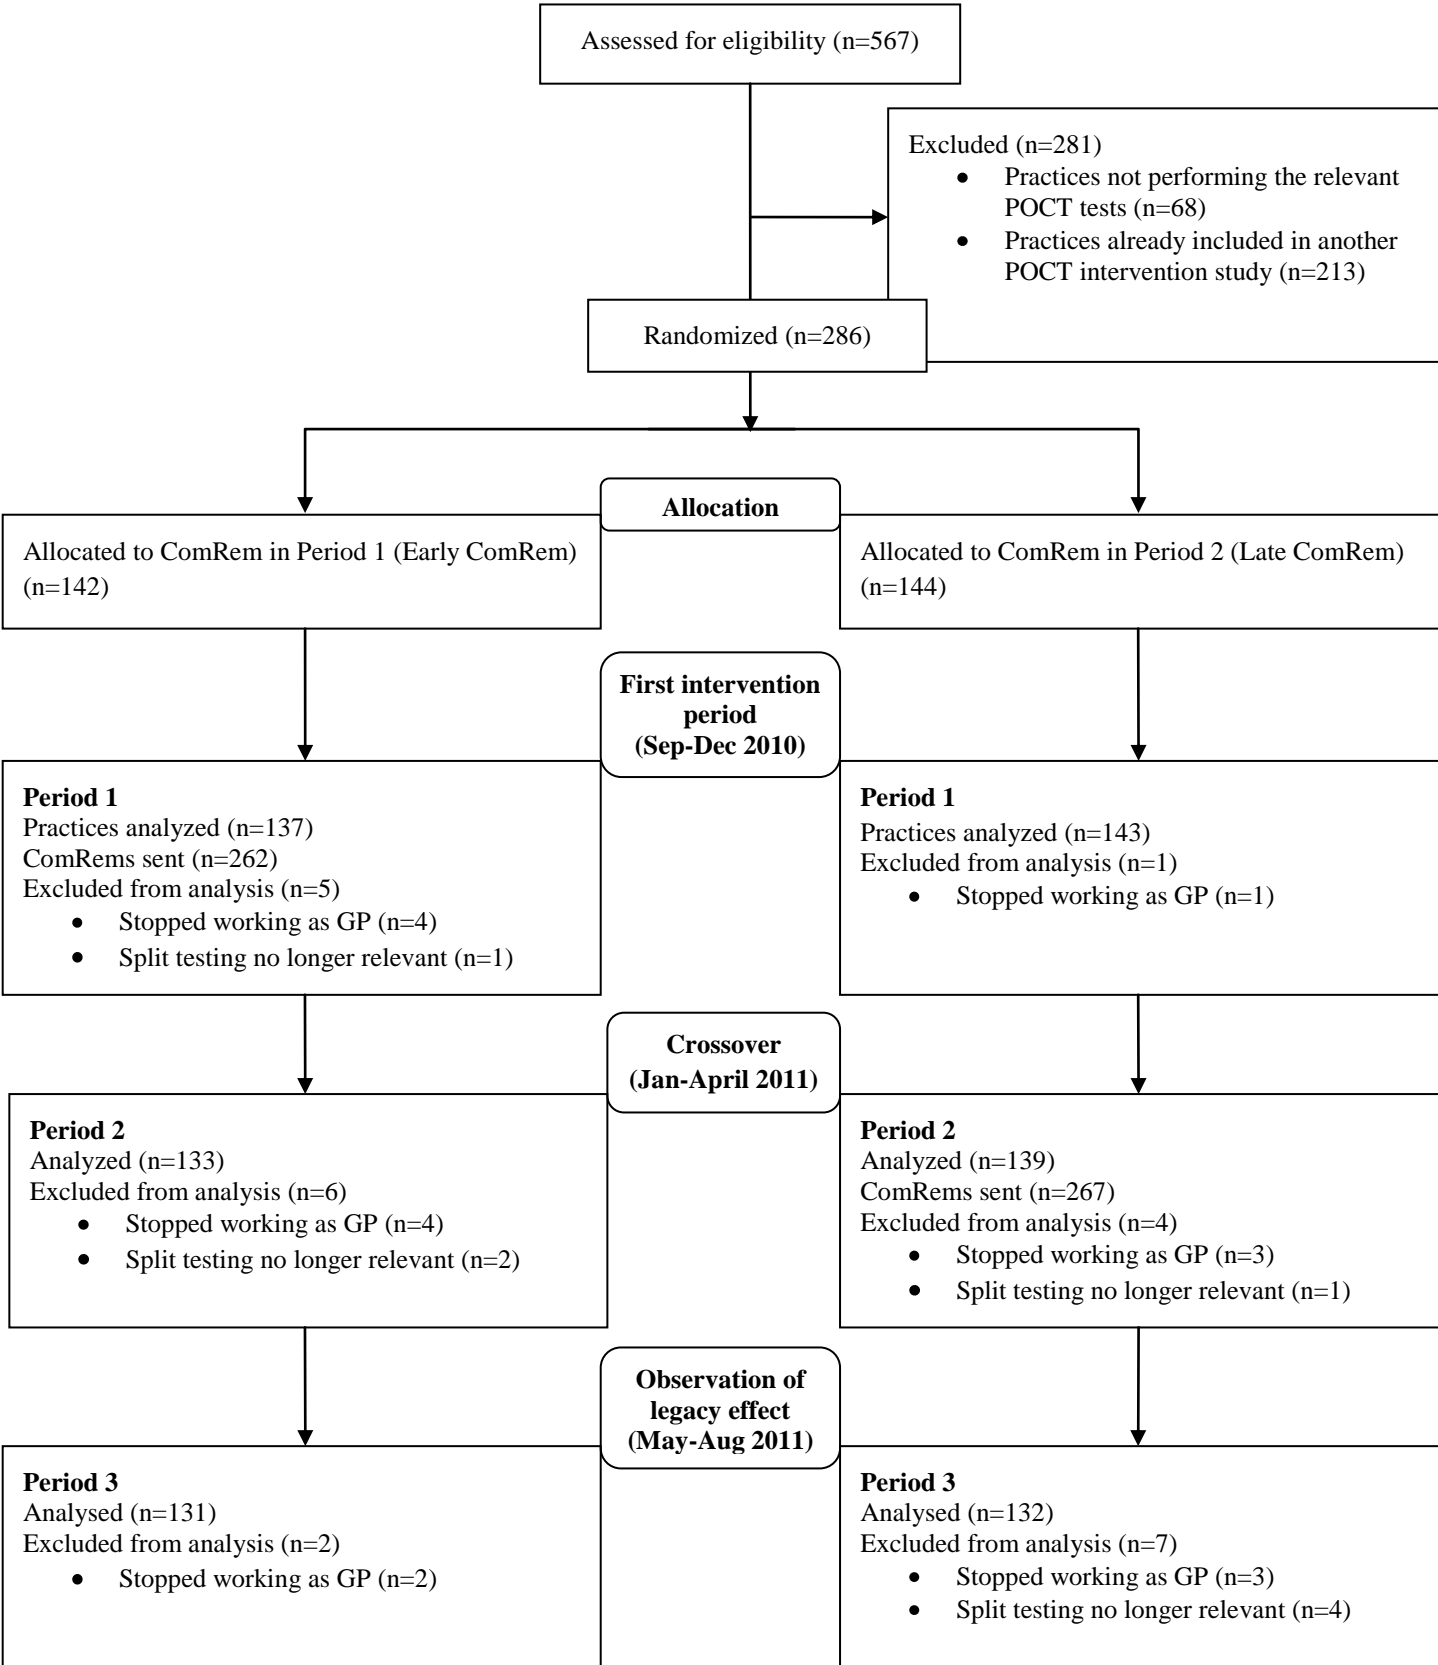

Supplement: MOESM2 [file 9630390]
